# Supplementary material
Source: Springer Nature journal article supplement (https://www.springermedizin.de/resource/supplementary/12985_2013_2231_MOESM7_ESM.pdf/9606322)

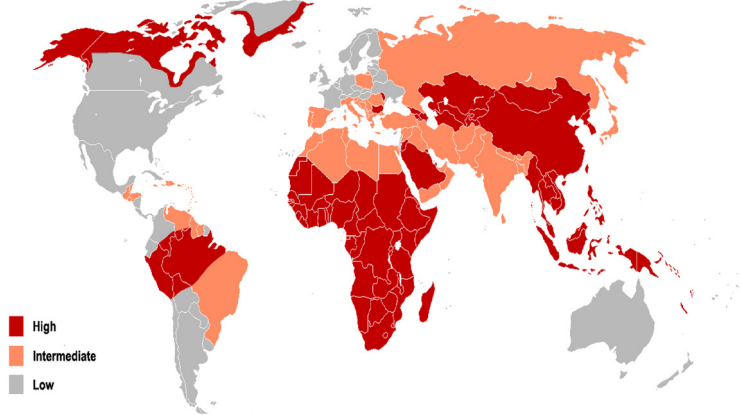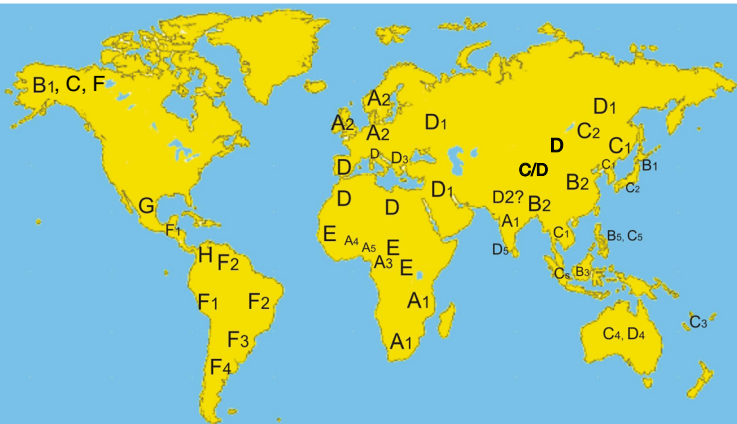

Supplement: MOESM7 [file 9606322]
